# Supplementary material for: Spatial Distribution and Antioxidant Activity of Extracts from Citrus Fruits
Source: MDPI journal article supplement (doi:10.3390/antiox12040781), 2023-03-23
Supplement: s1 [file s1]

Supplementary Table 2. Concentration ( $\mu\text{g/g}$ )  $\pm$  standard deviation of flavonoids, limonoids, phenolic acids and carboxylic acids found in citrus fruits (n=3).

| Flavonoids                  | Lime             |                  |                  |                 | Mandarin         |                  |                 |                 | Lemon            |                  |                  |                  |
|-----------------------------|------------------|------------------|------------------|-----------------|------------------|------------------|-----------------|-----------------|------------------|------------------|------------------|------------------|
|                             | Flavedo          | Albedo           | Segments         | Juice           | Flavedo          | Albedo           | Segments        | Juice           | Flavedo          | Albedo           | Segments         | Juice            |
| Apigenin-Glu-Gal            | 1133 $\pm$ 192   | 492 $\pm$ 176    | 647 $\pm$ 88.2   | 759 $\pm$ 20.5  | 908 $\pm$ 157    | 170 $\pm$ 48     | 151 $\pm$ 42.5  | 343 $\pm$ 106   | 597 $\pm$ 402    | 975 $\pm$ 105    | 515 $\pm$ 126    | 659 $\pm$ 85     |
| Diosmetin                   | 1 $\pm$ 0.3      | 0.7 $\pm$ 1.4    | 0.6 $\pm$ 0.3    | 0.4 $\pm$ 0.4   | 18.3 $\pm$ 1.1   | 0.3 $\pm$ 0.2    |                 |                 | 0.4 $\pm$ 0.5    | 1.7 $\pm$ 0.8    | 1.1 $\pm$ 0.2    | 1.5 $\pm$ 0.98   |
| Diosmin                     | 1746 $\pm$ 149   | 1422 $\pm$ 419   | 2605 $\pm$ 351   | 800 $\pm$ 1141  | 2476 $\pm$ 236   | 168 $\pm$ 29     | 111 $\pm$ 11    | 97 $\pm$ 3      | 1031 $\pm$ 681   | 2679 $\pm$ 337   | 2896 $\pm$ 327   | 1087 $\pm$ 194   |
| Eriocitrin                  | 756 $\pm$ 69     | 1568 $\pm$ 322   | 1742 $\pm$ 426   | 741 $\pm$ 887   | 199 $\pm$ 10     | 424 $\pm$ 53     | 157 $\pm$ 42    | 144 $\pm$ 96    | 194 $\pm$ 52     | 2178 $\pm$ 230   | 1956 $\pm$ 26.9  | 987 $\pm$ 142    |
| Eriodictyol-Glu-Rha-Glu     | 7.4 $\pm$ 1.7    | 40.2 $\pm$ 30.3  | 7.9 $\pm$ 2      | 0.9 $\pm$ 0.1   | 8.99 $\pm$ 5.2   | 23.3 $\pm$ 1.1   | 10.3 $\pm$ 2    | 0.9 $\pm$ 0     | 10.6 $\pm$ 5.2   | 113 $\pm$ 55.7   | 6.4 $\pm$ 7.9    | 8.1 $\pm$ 2.5    |
| Hesperetin                  | 4 $\pm$ 1.4      | 1.8 $\pm$ 2.8    | 0.9 $\pm$ 0.3    | 1 $\pm$ 1.2     | 0.98 $\pm$ 0.3   | 4.8 $\pm$ 2      | 0.6 $\pm$ 1.1   | 0.3 $\pm$ 0.2   | 0.2 $\pm$ 0.1    | 1.4 $\pm$ 0.2    | 0.6 $\pm$ 0.3    | 3.1 $\pm$ 0.8    |
| Hesperetin7-O-glucoside     | 34.7 $\pm$ 3.5   | 31.2 $\pm$ 12    | 38.9 $\pm$ 9.5   | 18.9 $\pm$ 26.8 | 41.4 $\pm$ 7.7   | 108 $\pm$ 328    | 5.5 $\pm$ 3.2   | 4.9 $\pm$ 4.8   | 7.6 $\pm$ 5      | 59.1 $\pm$ 19.9  | 52.5 $\pm$ 7.5   | 19.2 $\pm$ 2.4   |
| Hesperidin                  | 929 $\pm$ 361    | 5907 $\pm$ 418   | 4525 $\pm$ 552   | 1483 $\pm$ 1924 | 5069 $\pm$ 491   | 8366 $\pm$ 889   | 4424 $\pm$ 1389 | 2656 $\pm$ 3985 | 237 $\pm$ 82     | 6480 $\pm$ 548   | 3653 $\pm$ 695   | 2097 $\pm$ 306   |
| Homoorientin                | 365 $\pm$ 41.8   | 17.9 $\pm$ 8.3   | 38.8 $\pm$ 23.7  | 16.6 $\pm$ 2.5  | 206 $\pm$ 16.1   | 11.2 $\pm$ 0.4   | 12.6 $\pm$ 0.6  | 12.8 $\pm$ 3.7  | 41.3 $\pm$ 31.9  | 98.5 $\pm$ 29.4  | 77.1 $\pm$ 18    | 20.6 $\pm$ 4.03  |
| Isorhamnetin-3-O-rutinoside | 1597 $\pm$ 113   | 650 $\pm$ 224    | 970 $\pm$ 180    | 886 $\pm$ 1219  | 1514 $\pm$ 163   | 402 $\pm$ 35.9   | 320 $\pm$ 62.1  | 291 $\pm$ 171   | 1314 $\pm$ 694   | 1339 $\pm$ 215   | 1704 $\pm$ 250   | 1970 $\pm$ 353   |
| Limocitrin-HMG-Glu          | 6775 $\pm$ 914   | 317 $\pm$ 250    | 180 $\pm$ 20.8   | 550 $\pm$ 624   | 8162 $\pm$ 426   | 403 $\pm$ 130    | 153 $\pm$ 51.6  | 729 $\pm$ 1239  | 2744 $\pm$ 1615  | 391 $\pm$ 278    | 299 $\pm$ 25.8   | 1342 $\pm$ 25.8  |
| Limocitrin-Rut              | 444 $\pm$ 64.1   | 34.1 $\pm$ 22.8  | 27.8 $\pm$ 5.1   | 39.4 $\pm$ 32.3 | 361 $\pm$ 33.8   | 29.4 $\pm$ 3.2   | 22.3 $\pm$ 3    | 41.5 $\pm$ 21.1 | 217 $\pm$ 129    | 30.6 $\pm$ 6     | 45.4 $\pm$ 6.9   | 104 $\pm$ 16.4   |
| Limocitrol-Glu-HMG          | 3849 $\pm$ 411   | 183 $\pm$ 242    | 25.8 $\pm$ 6     | 149 $\pm$ 215   | 958 $\pm$ 60     | 34.5 $\pm$ 28    | 17.5 $\pm$ 3.9  | 63.7 $\pm$ 108  | 2000 $\pm$ 1243  | 238 $\pm$ 224    | 102 $\pm$ 15     | 320 $\pm$ 18.05  |
| Luteolin                    | 0.4 $\pm$ 0.2    | 0.4 $\pm$ 0.3    | 0.7 $\pm$ 0.4    | 0.3 $\pm$ 0.2   | 0.6 $\pm$ 0.1    | 6.7 $\pm$ 3.1    | 4.3 $\pm$ 3.6   | 3.5 $\pm$ 5.6   |                  | 1.3 $\pm$ 0.4    | 1.2 $\pm$ 0.2    |                  |
| Luteolin-Rha-Glu            | 1043 $\pm$ 48.6  | 589 $\pm$ 155    | 713 $\pm$ 154    | 267 $\pm$ 292   | 1235 $\pm$ 177   | 266 $\pm$ 529    | 99.3 $\pm$ 12.7 | 109 $\pm$ 32.1  | 460 $\pm$ 294    | 1423 $\pm$ 180   | 1192 $\pm$ 216   | 600 $\pm$ 115    |
| Naringenin                  | 1.4 $\pm$ 0.6    | 14.3 $\pm$ 2     | 5.9 $\pm$ 2.9    | 2.6 $\pm$ 3.7   | 15.9 $\pm$ 1.9   | 162 $\pm$ 22.4   | 43.4 $\pm$ 26.5 | 53.7 $\pm$ 82.9 | 0.5 $\pm$ 0.3    | 10.7 $\pm$ 1     | 1.2 $\pm$ 0.5    | 1.6 $\pm$ 0.1    |
| Naringin                    | 203 $\pm$ 9.7    | 1254 $\pm$ 102   | 717 $\pm$ 284    | 202 $\pm$ 151   | 1106 $\pm$ 111   | 5369 $\pm$ 352   | 2797 $\pm$ 1073 | 2151 $\pm$ 3066 | 138 $\pm$ 17.1   | 831 $\pm$ 30     | 259 $\pm$ 36.5   | 230 $\pm$ 22.6   |
| Neohesperidin               | 132 $\pm$ 52.5   | 676 $\pm$ 1247   | 261 $\pm$ 27.5   | 128 $\pm$ 46    | 365 $\pm$ 38     | 1659 $\pm$ 3645  | 269 $\pm$ 56.4  | 280 $\pm$ 349   | 224 $\pm$ 57.2   | 617 $\pm$ 122    | 207 $\pm$ 33.5   | 157 $\pm$ 16.5   |
| Orientin                    | 143 $\pm$ 7.8    | 15.1 $\pm$ 5.3   | 21.6 $\pm$ 3.1   | 13.6 $\pm$ 2.7  | 121 $\pm$ 51     | 10.2 $\pm$ 0.5   | 10.4 $\pm$ 1.1  | 11.7 $\pm$ 1.8  | 11.2 $\pm$ 1     | 73.1 $\pm$ 19.3  | 41.8 $\pm$ 7.9   | 16.3 $\pm$ 4.8   |
| Quercetin-3-arabinoside     | 10.9 $\pm$ 1.9   | 2.7 $\pm$ 0.8    | 0.9 $\pm$ 0      | 2.1 $\pm$ 0.8   | 2.5 $\pm$ 0.4    | 0.9 $\pm$ 0      | 0.9 $\pm$ 0     | 0.9 $\pm$ 0     | 11 $\pm$ 8       | 0.9 $\pm$ 0      | 0.9 $\pm$ 0      | 1.9 $\pm$ 0.5    |
| Quercetin-3'-glucoside      | 8.8 $\pm$ 3.1    | 3.6 $\pm$ 2.4    | 3.3 $\pm$ 2.5    | 0.9 $\pm$ 0     | 41.5 $\pm$ 10.4  | 4.5 $\pm$ 0.6    | 2.8 $\pm$ 0.8   | 0.9 $\pm$ 0     | 0.9 $\pm$ 0      | 11.2 $\pm$ 1.6   | 5.8 $\pm$ 2.4    | 3.1 $\pm$ 1.8    |
| Rhoifolin                   | 233 $\pm$ 10.1   | 302 $\pm$ 57.1   | 227 $\pm$ 63     | 22.1 $\pm$ 8.5  | 196 $\pm$ 34.6   | 334 $\pm$ 24.6   | 192 $\pm$ 75.3  | 100 $\pm$ 189   | 56.3 $\pm$ 18.1  | 147 $\pm$ 14.4   | 81 $\pm$ 27      | 123 $\pm$ 23.9   |
| Rutin                       | 501 $\pm$ 48.6   | 16.3 $\pm$ 5.9   | 109 $\pm$ 47.4   | 108 $\pm$ 155   | 1280 $\pm$ 144   | 136 $\pm$ 45.1   | 238 $\pm$ 131   | 209 $\pm$ 367   | 224 $\pm$ 170    | 26.9 $\pm$ 2.8   | 188 $\pm$ 38.4   | 273 $\pm$ 47.1   |
| Tangeritin                  | 82 $\pm$ 28      | 1.9 $\pm$ 1.2    | 4.4 $\pm$ 6.1    | 2.3 $\pm$ 2.5   | 4243 $\pm$ 359   | 217 $\pm$ 111    | 23.1 $\pm$ 27.4 | 293 $\pm$ 556   | 32.95 $\pm$ 29.8 | 0.2 $\pm$ 0.1    | 0.8 $\pm$ 1.3    | 2.6 $\pm$ 0.7    |
| Vitexin                     | 367 $\pm$ 22.7   | 67.3 $\pm$ 25.1  | 33.7 $\pm$ 4.7   | 6.9 $\pm$ 9.8   | 28.7 $\pm$ 3.03  | 1.7 $\pm$ 0.2    | 1.4 $\pm$ 1.5   | 1.5 $\pm$ 1.02  | 14.3 $\pm$ 15    | 155.5 $\pm$ 18.7 | 11.8 $\pm$ 5.8   | 6.9 $\pm$ 0.9    |
| Vitexin-2"-O-rhamnoside     | 432 $\pm$ 33.2   | 1184 $\pm$ 267   | 1076 $\pm$ 127   | 237 $\pm$ 235   | 261.4 $\pm$ 10.4 | 104 $\pm$ 21.2   | 99 $\pm$ 6.1    | 98.6 $\pm$ 6.2  | 118 $\pm$ 24.7   | 811 $\pm$ 194    | 261 $\pm$ 61.3   | 127 $\pm$ 8.1    |
| <i>Total flavonoids</i>     | 20801 $\pm$ 1999 | 14791 $\pm$ 2308 | 13983 $\pm$ 1934 | 6439 $\pm$ 6956 | 28820 $\pm$ 2165 | 18416 $\pm$ 3218 | 9165 $\pm$ 3013 | 7697 $\pm$ 9862 | 9684 $\pm$ 5531  | 18694 $\pm$ 2274 | 13560 $\pm$ 1153 | 10163 $\pm$ 1331 |
| Limonoids                   | Lime             |                  |                  |                 | Mandarin         |                  |                 |                 | Lemon            |                  |                  |                  |
|                             | Flavedo          | Albedo           | Segments         | Juice           | Flavedo          | Albedo           | Segments        | Juice           | Flavedo          | Albedo           | Segments         | Juice            |
| Nomilinicacid               |                  | 3.3 $\pm$ 2.6    | 13.4 $\pm$ 22.4  |                 |                  |                  |                 | 2.8 $\pm$ 4.4   |                  | 51.5 $\pm$ 6.9   | 23 $\pm$ 11      | 14.1 $\pm$ 8.8   |
| Nomilinicacidglucoside      |                  | 2.4 $\pm$ 3.2    | 142 $\pm$ 88     | 9.3 $\pm$ 8.1   |                  |                  | 15.7 $\pm$ 12.8 | 67.6 $\pm$ 234  |                  | 41.3 $\pm$ 13.8  | 209 $\pm$ 50     | 284 $\pm$ 49     |
| Obacunone                   |                  | 5.8 $\pm$ 10.2   |                  |                 |                  |                  |                 |                 |                  | 53.8 $\pm$ 11.8  | 3.2 $\pm$ 10.3   | 16.1 $\pm$ 4     |
| 21-O-Methyllimonexicacid    | 43.7 $\pm$ 12.7  |                  | 105 $\pm$ 87.2   | 47.1 $\pm$ 63.4 | 4.5 $\pm$ 1.6    | 53.7 $\pm$ 17.2  | 59 $\pm$ 64     | 138 $\pm$ 344   | 48.1 $\pm$ 26.8  | 753 $\pm$ 72.3   | 260 $\pm$ 136    | 583 $\pm$ 69.6   |

|                               |              |             |              |              |            |            |             |               |            |             |              |               |
|-------------------------------|--------------|-------------|--------------|--------------|------------|------------|-------------|---------------|------------|-------------|--------------|---------------|
| Limonin                       | 68.8 ± 20.04 | 27.2 ± 17.1 | 493 ± 182    | 286 ± 309    | 12.1 ± 1.8 | 92 ± 23.7  | 237 ± 169   | 554 ± 469     | 175 ± 90.1 | 1354 ± 155  | 960 ± 158    | 1007 ± 111    |
| LimonoicacidD-ringlactone     | 19.5 ± 1.8   | 5.1 ± 5.9   | 22.5 ± 10.7  | 27.4 ± 2.2   | 0.5 ± 1.1  | 6.5 ± 4.5  | 18.6 ± 17   | 53.7 ± 104    | 8 ± 6      | 42.8 ± 20.7 | 31.4 ± 3.6   | 24.1 ± 3.5    |
| Nomilin                       | 11.2 ± 0.4   | 100 ± 100   | 154 ± 117    | 159 ± 261    | 3.7 ± 0.6  | 48.9 ± 3.2 | 86.3 ± 69.3 | 195 ± 363     | 101 ± 63.5 | 1336 ± 108  | 555 ± 204    | 536 ± 64.9    |
| <i>Total limonoids</i>        | 143 ± 32.5   | 144 ± 125   | 929 ± 507    | 529 ± 503    | 20.9 ± 3.3 | 201 ± 44.9 | 417 ± 332   | 1014 ± 1438   | 332 ± 186  | 3632 ± 218  | 2041 ± 510   | 2464 ± 287    |
|                               |              |             |              |              |            |            |             |               |            |             |              |               |
| SimplePhenols                 | Lime         |             |              |              | Mandarin   |            |             |               | Lemon      |             |              |               |
|                               | Flavedo      | Albedo      | Segments     | Juice        | Flavedo    | Albedo     | Segments    | Juice         | Flavedo    | Albedo      | Segments     | Juice         |
| Shikimicacid                  | 6.3 ± 0.6    | 3.9 ± 1.6   | 4.7 ± 1.3    | 2.1 ± 0.2    | 7.8 ± 0.3  | 29.5 ± 4.6 | 28.5 ± 7.4  | 7.5 ± 1.2     | 6.4 ± 2.8  | 6.4 ± 2     | 11.6 ± 1.6   | 0.7 ± 0.4     |
| 2-Coumaricacid                | 19.5 ± 3.6   | 15.3 ± 3.9  | 1.2 ± 1.2    | 1.7 ± 2      |            |            | 0.3 ± 0.2   | 1.5 ± 3.3     | 12.2 ± 5   | 60.1 ± 34.3 | 10.4 ± 3.4   | 17.3 ± 3.6    |
| Pyrogallol                    | 135 ± 17.2   |             | 307 ± 30.3   | 351 ± 77.1   | 413 ± 27.2 | 382 ± 14.6 | 413 ± 4.01  | 154 ± 100     | 131 ± 34.1 | 774 ± 81.6  | 285 ± 37     | 282 ± 54.7    |
| Ferulicacid                   | 3.4 ± 0.8    | 10.1 ± 6.2  | 8 ± 2.9      | 22.03 ± 28.1 | 11.7 ± 2.8 | 17.1 ± 3.1 | 10.2 ± 4.7  | 41 ± 65.6     | 10.6 ± 6.5 | 128 ± 33.7  | 40.7 ± 8.1   | 159 ± 24.6    |
| 4-Hydroxybenzoicacid          | 0.3 ± 0.3    | 1.1 ± 0.5   | 1.3 ± 0.4    | 2.1 ± 3.1    | 4.04 ± 0.3 | 2.8 ± 0.2  | 1.2 ± 0.9   | 2.5 ± 1.4     | 2.9 ± 1.4  | 58.2 ± 17.4 | 4.7 ± 0.9    | 10 ± 1.5      |
| <i>Total phenolic acids</i>   | 164 ± 12.9   | 30.4 ± 10.4 | 322 ± 28.5   | 379 ± 47.8   | 437 ± 29   | 431 ± 9.4  | 453 ± 12.5  | 206 ± 152     | 163 ± 47.5 | 1027 ± 152  | 352 ± 37     | 469 ± 83.8    |
|                               |              |             |              |              |            |            |             |               |            |             |              |               |
| Carboxylic acids              | Lime         |             |              |              | Mandarin   |            |             |               | Lemon      |             |              |               |
|                               | Flavedo      | Albedo      | Segments     | Juice        | Flavedo    | Albedo     | Segments    | Juice         | Flavedo    | Albedo      | Segments     | Juice         |
| Malicacid                     | 154 ± 2.9    | 715 ± 363   | 1260 ± 491   | 1636 ± 477   | 145 ± 6.8  | 542 ± 85.2 | 818 ± 260   | 1325 ± 3070   | 138 ± 3.3  | 790 ± 103   | 1433 ± 227   | 7648 ± 2491   |
| Ascorbicacid                  | 12.5 ± 1.4   | 117 ± 137   | 266 ± 131    | 648 ± 799    | 133 ± 11.9 | 135 ± 76.1 | 556 ± 229   | 947 ± 1562    | 13.5 ± 2.1 | 1027 ± 114  | 1213 ± 238   | 1817 ± 280    |
| Citricacid                    | 141 ± 26     | 6017 ± 3691 | 12840 ± 2246 | 10267 ± 3238 | 161 ± 3.6  | 176 ± 19.9 | 3636 ± 1367 | 11881 ± 30451 | 147 ± 9.6  | 7713 ± 2924 | 15715 ± 2013 | 51982 ± 11520 |
| <i>Total carboxylic acids</i> | 307 ± 30     | 6849 ± 4168 | 14367 ± 2216 | 12551 ± 2945 | 439 ± 8.2  | 852 ± 173  | 5011 ± 1851 | 14153 ± 34287 | 298 ± 10.3 | 9529 ± 2971 | 18361 ± 2348 | 61447 ± 14286 |
