# Supplementary material for: Spatial Distribution and Antioxidant Activity of Extracts from Citrus Fruits
Source: MDPI journal article supplement (doi:10.3390/antiox12040781), 2023-03-23
Supplement: s1 [file s1]

Supplementary table 1. Parameters for identification of bioactive compounds in the studied citrus fruits.

| Compound name                | Formula                                         | Mass     | RT    | m/z      | Deprotonated ion   | Main product ions |          |          | CAS ID      |
|------------------------------|-------------------------------------------------|----------|-------|----------|--------------------|-------------------|----------|----------|-------------|
|                              |                                                 |          |       |          |                    | 1                 | 2        | 3        |             |
| Flavonoids                   |                                                 |          |       |          |                    |                   |          |          |             |
| Naringenin                   | C <sub>15</sub> H <sub>12</sub> O <sub>5</sub>  | 272.0680 | 9.76  | 273.0720 | [M-H] <sup>-</sup> | 153.0186          | 147.0441 |          | 480-41-1    |
| Naringenin (isomer)          | C <sub>15</sub> H <sub>12</sub> O <sub>5</sub>  | 272.0690 | 10.59 | 273.0720 | [M-H] <sup>-</sup> | 153.0156          | 147.0400 |          | 480-41-1    |
| Luteolin                     | C <sub>15</sub> H <sub>10</sub> O <sub>6</sub>  | 286.0490 | 9.59  | 287.0555 | [M-H] <sup>-</sup> | 153.0172          |          |          | 491-70-3    |
| Diosmetin                    | C <sub>16</sub> H <sub>12</sub> O <sub>6</sub>  | 300.0630 | 13.46 | 301.0728 | [M-H] <sup>-</sup> | 286.0408          | 258.0527 | 153.0125 | 520-34-3    |
| Hesperetin                   | C <sub>16</sub> H <sub>14</sub> O <sub>6</sub>  | 302.0780 | 13.68 | 303.0867 | [M-H] <sup>-</sup> | 177.0549          | 153.0185 | 111.0050 |             |
| Tangeritin (isomer 1)        | C <sub>20</sub> H <sub>20</sub> O <sub>7</sub>  | 372.1200 | 14.26 | 373.1294 | [M-H] <sup>-</sup> | 343.0869          | 312.1041 | 153.0205 |             |
| Tangeritin (isomer 2)        | C <sub>20</sub> H <sub>20</sub> O <sub>7</sub>  | 372.1200 | 13.70 | 373.1296 | [M-H] <sup>-</sup> | 358.1058          | 343.0829 | 153.0173 |             |
| Tangeritin                   | C <sub>20</sub> H <sub>20</sub> O <sub>7</sub>  | 372.1220 | 15.38 | 373.1294 | [M-H] <sup>-</sup> | 358.1061          | 343.0826 | 312.1010 |             |
| Vitexin                      | C <sub>21</sub> H <sub>20</sub> O <sub>10</sub> | 432.1060 | 9.44  | 433.1154 | [M-H] <sup>-</sup> | 337.0713          | 313.0715 | 283.0609 | 3681-93-4   |
| Quercetin-3-arabinoside      | C <sub>20</sub> H <sub>18</sub> O <sub>11</sub> | 434.0970 | 14.32 | 435.1033 | [M-H] <sup>-</sup> | 303.0498          | 153.0179 |          | 22255-13-6  |
| Homoorientin                 | C <sub>21</sub> H <sub>20</sub> O <sub>11</sub> | 448.1020 | 8.92  | 449.1095 | [M-H] <sup>-</sup> | 329.0663          | 299.0551 | 127.0382 | 4261-42-1   |
| Orientin                     | C <sub>21</sub> H <sub>20</sub> O <sub>11</sub> | 448.1030 | 9.14  | 449.1053 | [M-H] <sup>-</sup> | 329.0543          | 299.0445 | 127.0334 | 28608-75-5  |
| Quercetin-3'-glucoside       | C <sub>21</sub> H <sub>20</sub> O <sub>12</sub> | 464.0960 | 9.22  | 465.1030 | [M-H] <sup>-</sup> | 303.0499          | 153.0171 | 129.0529 | 482-35-9    |
| Hesperetin 7-O-glucoside     | C <sub>22</sub> H <sub>24</sub> O <sub>11</sub> | 464.1318 | 9.97  | 465.1393 | [M-H] <sup>-</sup> | 303.0871          | 53.0172  |          | 114248-44-1 |
| Isorhamnetin3-O-glucoside    | C <sub>22</sub> H <sub>22</sub> O <sub>12</sub> | 478.1130 | 10.25 | 479.1215 | [M-H] <sup>-</sup> | 317.0669          | 97.0274  |          | 5041-82-7   |
| Rhoifolin                    | C <sub>27</sub> H <sub>30</sub> O <sub>14</sub> | 578.1640 | 9.62  | 579.1718 | [M-H] <sup>-</sup> | 433.1151          | 271.0611 | 129.0548 | 17306-46-6  |
| Vitexin-2"-O-rhamnoside      | C <sub>27</sub> H <sub>30</sub> O <sub>14</sub> | 578.1650 | 9.14  | 579.1677 | [M-H] <sup>-</sup> | 433.1191          | 313.0745 | 283.0653 | 64820-99-1  |
| Naringin                     | C <sub>27</sub> H <sub>32</sub> O <sub>14</sub> | 580.1800 | 8.78  | 581.1877 | [M-H] <sup>-</sup> | 273.0743          | 195.0272 | 129.0537 |             |
| Naringin (isomer)            | C <sub>27</sub> H <sub>32</sub> O <sub>14</sub> | 580.1820 | 9.88  | 581.1877 | [M-H] <sup>-</sup> | 273.0760          | 195.0292 | 129.0545 | 10236-47-2  |
| Eriocitrin                   | C <sub>27</sub> H <sub>32</sub> O <sub>15</sub> | 596.1770 | 9.25  | 597.1830 | [M-H] <sup>-</sup> | 289.0750          | 129.0566 |          | 13463-28-0  |
| Diosmin                      | C <sub>28</sub> H <sub>32</sub> O <sub>15</sub> | 608.1750 | 9.85  | 609.1833 | [M-H] <sup>-</sup> | 463.1262          | 301.0722 | 129.0544 |             |
| Rutin                        | C <sub>27</sub> H <sub>30</sub> O <sub>16</sub> | 610.1540 | 9.21  | 611.1625 | [M-H] <sup>-</sup> | 303.0516          | 153.0176 | 129.0553 | 153-18-4    |
| Neohesperidin                | C <sub>28</sub> H <sub>34</sub> O <sub>15</sub> | 610.1910 | 10.56 | 611.1986 | [M-H] <sup>-</sup> | 303.0852          | 153.0174 | 129.0537 | 13241-33-3  |
| Hesperidin                   | C <sub>28</sub> H <sub>34</sub> O <sub>15</sub> | 610.1920 | 10.05 | 611.1986 | [M-H] <sup>-</sup> | 303.0874          | 129.0550 | 153.0178 | 520-26-3    |
| Isorhamnetin-3-O-rutinoside  | C <sub>28</sub> H <sub>32</sub> O <sub>16</sub> | 624.1650 | 8.66  | 623.1591 | [M-H] <sup>-</sup> | 315.0489          | 300.0262 |          | 604-80-8    |
| Luteolin-Rha-Glu             | C <sub>27</sub> H <sub>30</sub> O <sub>15</sub> | 594.1610 | 9.23  | 595.1679 | [M-H] <sup>-</sup> | 449.1104          | 287.0564 |          |             |
| Apigenin-Glu-Gal             | C <sub>27</sub> H <sub>30</sub> O <sub>15</sub> | 594.1620 | 8.95  | 595.1679 | [M-H] <sup>-</sup> | 433.1130          | 613.0000 |          |             |
| Limocitrin-Hmg-Glu           | C <sub>29</sub> H <sub>32</sub> O <sub>17</sub> | 652.1620 | 10.34 | 651.1510 | [M-H] <sup>-</sup> | 549.1223          | 507.1116 | 345.0585 |             |
| Limocitrin-Rut               | C <sub>29</sub> H <sub>34</sub> O <sub>17</sub> | 654.1770 | 9.62  | 653.1685 | [M-H] <sup>-</sup> | 345.0590          | 303.0319 | 199.1116 |             |
| Limocitrol-Glu-Hmg           | C <sub>30</sub> H <sub>34</sub> O <sub>18</sub> | 682.1710 | 10.32 | 681.1635 | [M-H] <sup>-</sup> | 609.1767          | 537.1194 | 375.0663 |             |
| Eriodictyol-Glu-Rha-Glu      | C <sub>33</sub> H <sub>42</sub> O <sub>20</sub> | 758.2220 | 8.51  | 757.2111 | [M-H] <sup>-</sup> | 595.1640          | 449.1053 | 287.0725 |             |
| Limonoids                    |                                                 |          |       |          |                    |                   |          |          |             |
| Limonin                      | C <sub>26</sub> H <sub>30</sub> O <sub>8</sub>  | 470.1940 | 14.31 | 471.2020 | [M-H] <sup>-</sup> | 453.1906          | 425.1956 | 161.0595 | 1180-71-8   |
| Nomilin                      | C <sub>28</sub> H <sub>34</sub> O <sub>9</sub>  | 514.2200 | 14.62 | 515.2320 | [M-H] <sup>-</sup> | 469.2240          | 187.0754 | 161.0595 | 1063-77-0   |
| Nomilin (isomer)             | C <sub>28</sub> H <sub>34</sub> O <sub>9</sub>  | 514.2220 | 13.21 | 515.2320 | [M-H] <sup>-</sup> | 499.2661          | 187.0735 | 161.0566 | 1063-77-0   |
| Obacunone                    | C <sub>26</sub> H <sub>30</sub> O <sub>7</sub>  | 454.1990 | 14.62 | 455.2048 | [M-H] <sup>-</sup> | 409.2018          | 331.1342 | 161.0598 | 751-03-1    |
| Nomilinic acid               | C <sub>28</sub> H <sub>36</sub> O <sub>10</sub> | 532.2340 | 14.13 | 533.2325 | [M-H] <sup>-</sup> | 411.2202          | 369.2034 | 161.0619 |             |
| Limonoic acid D-ring lactone | C <sub>26</sub> H <sub>32</sub> O <sub>9</sub>  | 488.2040 | 13.71 | 489.2119 | [M-H] <sup>-</sup> | 471.2005          | 369.3169 | 161.0594 |             |
| Limonoic acid A-ring lactone | C <sub>26</sub> H <sub>32</sub> O <sub>9</sub>  | 488.2050 | 9.53  | 489.2119 | [M-H] <sup>-</sup> | 471.1967          | 369.1640 | 161.0577 |             |
| Nomilinic acid glucoside     | C <sub>34</sub> H <sub>48</sub> O <sub>16</sub> | 712.2980 | 10.64 | 713.3008 | [M-H] <sup>-</sup> | 551.2486          | 369.2028 | 161.0612 |             |
| 21-O-Methyllimonexic acid    | C <sub>27</sub> H <sub>32</sub> O <sub>10</sub> | 516.1970 | 14.36 | 515.2001 | [M-H] <sup>-</sup> | 480.1376          | 469.1934 | 229.1225 |             |
| Simple phenols               |                                                 |          |       |          |                    |                   |          |          |             |
| 4-Hydroxybenzoic acid        | C <sub>7</sub> H <sub>6</sub> O <sub>3</sub>    | 138.0320 | 8.20  | 139.0387 | [M-H] <sup>-</sup> | 121.0282          | 93.0327  | 77.0389  | 99-96-7     |
| 2-Coumaric acid              | C <sub>9</sub> H <sub>8</sub> O <sub>3</sub>    | 164.0480 | 11.46 | 165.0521 | [M-H] <sup>-</sup> | 147.0448          | 119.0496 | 91.0539  | 583-17-5    |
| Shikimic acid                | C <sub>7</sub> H <sub>10</sub> O <sub>5</sub>   | 174.0520 | 3.29  | 173.0475 | [M-H] <sup>-</sup> | 111.0465          | 93.0358  | 73.0309  | 138-59-0    |
| Ferulic acid                 | C <sub>10</sub> H <sub>10</sub> O <sub>4</sub>  | 194.0580 | 8.85  | 195.0623 | [M-H] <sup>-</sup> | 177.0514          | 145.0253 | 117.0307 | 537-98-4    |
| Pyrogallol                   | C <sub>6</sub> H <sub>6</sub> O <sub>3</sub>    | 126.0320 | 2.80  | 127.0370 | [M-H] <sup>-</sup> | 109.0294          | 81.0332  | 53.0387  | 87-66-1     |

|                         |                                              |          |      |          |                    |          |         |         |           |          |
|-------------------------|----------------------------------------------|----------|------|----------|--------------------|----------|---------|---------|-----------|----------|
| Pyrogallol (isomer)     | C <sub>6</sub> H <sub>6</sub> O <sub>3</sub> | 126.0320 | 4.64 | 127.0370 | [M-H] <sup>-</sup> | 109.0266 | 81.0316 | 53.0367 | 87-66-1   | <i>b</i> |
| <b>Carboxylic acids</b> |                                              |          |      |          |                    |          |         |         |           |          |
| Ascorbic acid           | C <sub>6</sub> H <sub>8</sub> O <sub>6</sub> | 176.0320 | 3.36 | 175.0231 | [M-H] <sup>-</sup> | 115.0023 | 87.0079 | 71.0129 | 50-81-7   | <i>a</i> |
| Citric acid             | C <sub>6</sub> H <sub>8</sub> O <sub>7</sub> | 192.0290 | 3.78 | 191.0224 | [M-H] <sup>-</sup> | 111.0104 | 85.0513 | 73.0305 | 77-92-9   | <i>a</i> |
| Malic acid              | C <sub>4</sub> H <sub>6</sub> O <sub>5</sub> | 134.0200 | 3.39 | 133.0133 | [M-H] <sup>-</sup> | 115.0035 | 89.0245 | 71.0139 | 6915-15-7 | <i>a</i> |

RT, retention time. Identification confirmed by standard (*a*), tentative identification by MS2 spectrum similarity to the isomer (score > 90%) (*b*), tentative identification by neutral mass losses and fragmentation pattern analysis (*c*). Glu, glucoside; Rha, rhamnoside; Rut, rutinoside; Gal, galactoside; Hmg, hydroxymethylglutaryl.
